# Supplementary material
Source: Springer Nature journal article supplement (https://www.springermedizin.de/resource/supplementary/12876_2009_400_MOESM2_ESM.pdf/9437104)

### C-patient

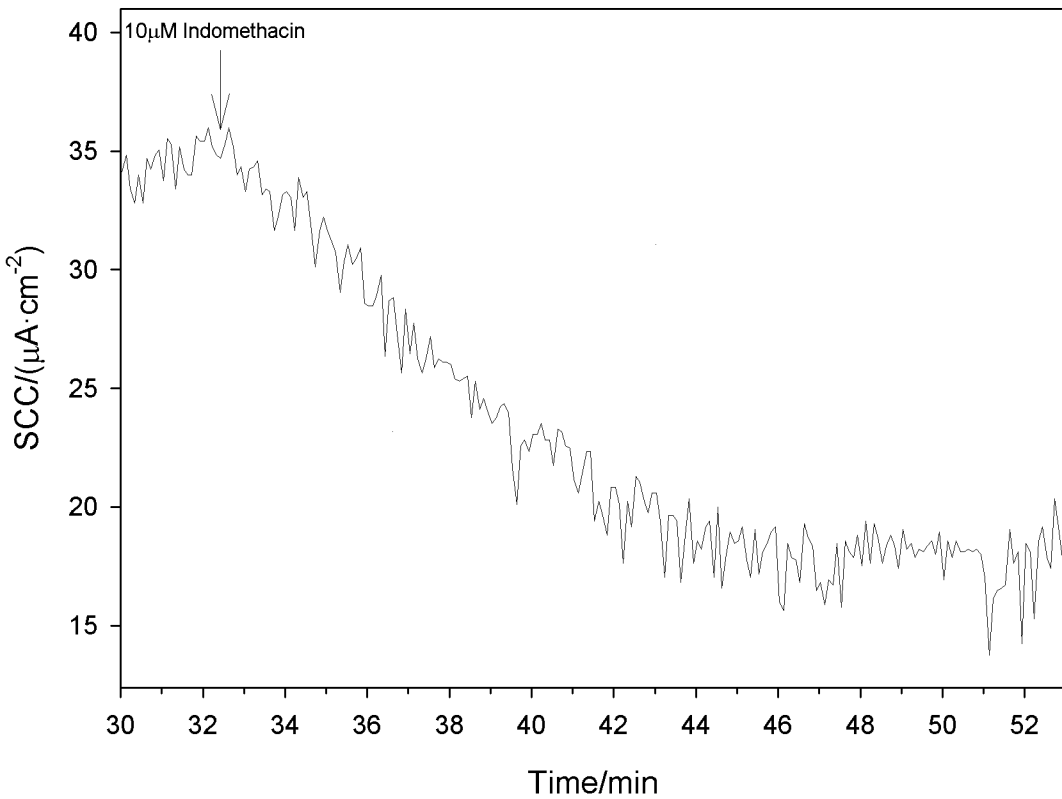

### N-patient

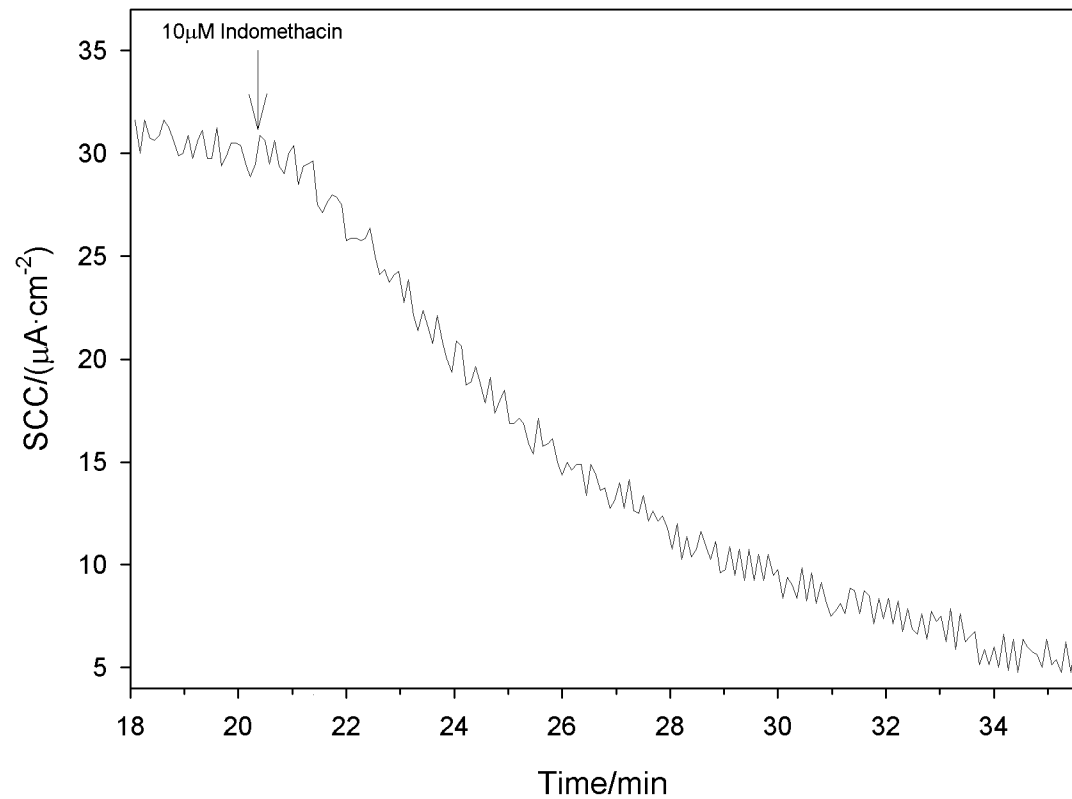

Supplement: MOESM2 [file 9437104]
